# Supplementary material
Source: publisher site journal article supplement (https://www.degruyter.com/publication/journal_key/PP/downloadAsset/PP_Article%20Processing%20Charges.pdf)
Supplement: Supplementary file 1 [file PP_Article%20Processing%20Charges.pdf]

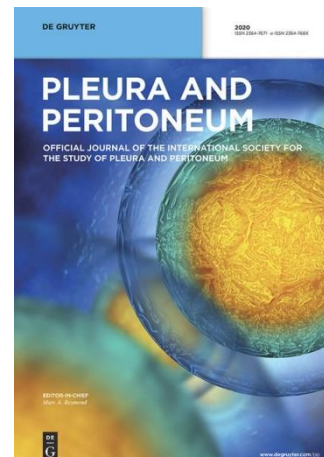

## APC guide for Pleura and Peritoneum

### In brief

- Fully gold open access journal
- All articles are published under a CC BY 4.0 license.
- Authors retain copyright.
- Article processing charge (APC) of € 2000 per accepted paper.
- 50% discounted APC of € 1000 available for authors of unsolicited manuscripts in 2024.
- 100% discounted APC for authors of invited papers
- Funding support and discount and waiver policies in place.
- Authors might be covered by our institutional open access agreements, meaning that they may not have to pay the (full) APC.

### Article processing charges

To sustain the publication of our fully refereed open access journal, each article accepted for publication in Pleura and Peritoneum is subject to an article processing charge (APC) of € 1000. There are no submission charges.

The fee is used to cover the costs of the peer review process, professional typesetting, and copyediting, as well as online hosting, long-term preservation, abstracting and indexing and promotion to potential readers.

### Editorial independence

Editors and Reviewers are not involved in the payment of authors and do not discuss costs with authors. The ability to pay has no influence on whether a manuscript is accepted for publication.

### Payment process

We have partnered with RightsLink (provided by the Copyright Clearance Center) to organize the payments of APCs. Payment can be made in EUR, USD or GBP, and may be subject to VAT.

Publication fees are due upon acceptance of the article. An APC payment link will be sent to the corresponding author upon acceptance of the article. Please note that the publication can only take place once payment has been received.

### Funding support and waiver policies

We firmly believe that the quality of articles, and not an author's financial capacity, should be the decisive factor for journals to publish. The lack of funding should not be a barrier to publishing with us. Within our fully gold APC journal portfolio, we offer the following support for authors:

- Discounts and waivers for authors affiliated with institutions that have an agreement with De Gruyter
- Discount and waivers for authors coming from low or lower-middle income countries
- Discretionary discounts and waivers on a case-by-case basis

For more details please visit our [OA pages](#).

### Contact

Inquiries about Article Processing Charges should be addressed to:

#### Editorial Office

Heike Jahnke

E-mail: [pap.editorial@degruyter.com](mailto:pap.editorial@degruyter.com)
